# Supplementary material for: Systematic review of health and behavioural outcomes of smoking cessation interventions in prisons
Source: PubMed Central journal article supplement — Tob Control. 2016 Oct 18;26(5):495–501. doi: 10.1136/tobaccocontrol-2016-053297 (PMC5574402; doi:10.1136/tobaccocontrol-2016-053297), 2016-10-18
Supplement: tobaccocontrol-2016-053297supp001.pdf [file tobaccocontrol-2016-053297supp001.pdf]

Table 3: Summary of articles included in review

| Rating                           | Study, Country                                | Design               | Intervention                                                                                                                                                                                                                                                                        | Sample                                                                                                   | Method of Analysis                                                                                                                 | Outcomes                                                                                                                                                                                                                                                                                                                                                                                                                                            |             |
|----------------------------------|-----------------------------------------------|----------------------|-------------------------------------------------------------------------------------------------------------------------------------------------------------------------------------------------------------------------------------------------------------------------------------|----------------------------------------------------------------------------------------------------------|------------------------------------------------------------------------------------------------------------------------------------|-----------------------------------------------------------------------------------------------------------------------------------------------------------------------------------------------------------------------------------------------------------------------------------------------------------------------------------------------------------------------------------------------------------------------------------------------------|-------------|
|                                  |                                               |                      |                                                                                                                                                                                                                                                                                     |                                                                                                          |                                                                                                                                    | Cessation                                                                                                                                                                                                                                                                                                                                                                                                                                           | Behavioural |
| <b>Smoking Cessation Program</b> |                                               |                      |                                                                                                                                                                                                                                                                                     |                                                                                                          |                                                                                                                                    |                                                                                                                                                                                                                                                                                                                                                                                                                                                     |             |
| S                                | Clarke <i>et al.</i> 2013 [44]<br>USA         | RCT                  | Pre-release intervention from prison with complete smoking ban<br>6 weekly sessions of MI & CBT.<br>2 brief phone follow-up sessions 1 day & 1 weeks post-release<br>Abstinence validated urine cotinine measures                                                                   | Male & female prisoners (35% female)<br><i>Intervention: n=122</i><br><i>Control: n=125</i>              | Intention to treat<br>Long-term effect: generalised estimating equation<br>Group comparisons: Logistic regression                  | Significant long term impact on CA rates at follow ups (Intervention vs Control):<br>25.4% vs 7.2% - 3 weeks (>60% of control relapsed first day)<br>11.5% vs 2.4% - 3 months<br>Predictors of abstinence at 3 weeks post-release ( $p=0.05$ ):<br>Intervention (OR=6.6); incarcerated > 6 months (OR=4.6); Hispanic (OR=3.2); planning to not smoke (OR=1.6)                                                                                       |             |
| S                                | Jalali <i>et al.</i> 2015 [33]<br>Iran        | RCT (double-blinded) | <i>Intervention: group 1</i><br>5 sessions of MI over 5 weeks<br><i>Intervention: group 2</i><br>5 sessions MI with 5 weeks NRT<br><i>Control: no intervention</i><br>Reductions in smoking within and between groups validated by expired CO readings<br>Follow-up in prison       | Male prisoners<br><i>Intervention 1: n=71</i><br><i>Intervention 2: n=71</i><br><br><i>Control: n=71</i> | $\chi^2$ test (group comparisons)<br>one sample t-test<br>paired sample t-test<br>Repeated-measures ANOVA<br>Scheffe post hoc test | <i>CO readings pre-post mean change</i><br>End of treatment (5 weeks) :<br>MI: $7.80 \pm 4.34$ ( $p=0.001$ )<br>MI + NRT: $10.87 \pm 4.53$ ( $p=0.001$ )<br>90 day (3 month) follow up:<br>MI: $7.81 \pm 4.80$ ( $p=0.001$ )<br>MI + NRT: $11.24 \pm 3.82$ ( $p=0.001$ )<br>CPD and FTND test scores pre-post for MI and MI+NRT groups also significant ( $p=0.02$ )<br><i>Pre-follow up CO mean change</i><br>MI +NRT vs MI /control ( $p=0.001$ ) |             |
| S                                | Richmond <i>et al.</i> 2013 [38]<br>Australia | RCT                  | Testing long-term effectiveness of NOR as a part of an already effective smoking cessation intervention<br><i>Intervention: 2 brief CBT sessions, NRT, NOR</i><br><i>Control: 2 brief CBT sessions, NRT, placebo in place of NOR</i><br>Abstinence validated by expired CO readings | Male prisoners<br><i>Intervention: n=206</i><br><i>Control: n=219</i>                                    | Intention to treat<br>Group comparisons: OR                                                                                        | NOR has no significant long term impact on CA rates at follow ups (Intervention vs Control):<br>23.8% vs 16.4% - 3 months<br>17.5 vs 12.3% - 6 months<br>11.7% vs 11.9 - 12 months                                                                                                                                                                                                                                                                  |             |

| Rating | Study, Country                                                                 | Design   | Intervention                                                                                                                                                                                                                                                                                        | Sample                                                                                      | Method of Analysis                                                                                             | Outcomes                                                                                                                                                                                                                                                                                                                                                                                                                                                                                                                                  |             |
|--------|--------------------------------------------------------------------------------|----------|-----------------------------------------------------------------------------------------------------------------------------------------------------------------------------------------------------------------------------------------------------------------------------------------------------|---------------------------------------------------------------------------------------------|----------------------------------------------------------------------------------------------------------------|-------------------------------------------------------------------------------------------------------------------------------------------------------------------------------------------------------------------------------------------------------------------------------------------------------------------------------------------------------------------------------------------------------------------------------------------------------------------------------------------------------------------------------------------|-------------|
|        |                                                                                |          |                                                                                                                                                                                                                                                                                                     |                                                                                             |                                                                                                                | Cessation                                                                                                                                                                                                                                                                                                                                                                                                                                                                                                                                 | Behavioural |
| M      | Cropsey <i>et al.</i> 2008 [30]<br>USA                                         | RCT      | <i>Intervention:</i><br>Baseline questions: sociodemographics, smoking history, readiness to quit, quit history, CES-D-20.<br>Received NRT and 10-session group counselling intervention based on mood management<br><i>Control:</i> no intervention<br>Abstinence validated by expired CO readings | Female prisoners<br><i>Intervention:</i> n=250<br><i>Control:</i> n=289, waiting list group | $\chi^2$ test (group comparisons) Repeated-measures ANOVA<br>Long-term effect: generalised estimating equation | PPA rates at follow ups:<br>18.4% - end of treatment<br>16.8% - 3 month follow-up<br>14.0% - 6 month follow-up<br>11.6% - 12 month follow-up<br><br>Intervention vs control at 6 months<br>14.0% vs 2.8% ( $p=0.001$ )                                                                                                                                                                                                                                                                                                                    |             |
| M      | Naik, Khanagar, Kumar, Ramachandra, Vadavadagi & Dhananjaya 2014 [37]<br>India | Pre-post | RCT<br>Testing short and long-term effectiveness of MI on CPD, attempting to quit, willingness to quit and CO reading<br>Intervention: MI (no. of sessions or setting details unknown)<br>Abstinence validated by expired CO readings<br>Follow up in prison                                        | Male prisoners<br><i>Intervention:</i> n=300<br><i>Control:</i> n=300                       | Chi-square<br>Fisher's exact test                                                                              | MI had significant short term impact on health outcomes, but not maintained at 6 month follow-up<br><i>Intervention Pre-Post</i><br>CPD ↓ ( $p<.001$ )<br>Quit smoking = 16%<br>Quit attempt: 25.7% vs 78.3% ( $p<.001$ )<br>CO levels ↓ ( $p<.001$ )<br>Reason to quit = health<br>64.3% vs 80.6% ( $p<.001$ )<br><i>Intervention vs Control – 6 months</i><br>CPD ( $p=0.92$ )<br>Quit attempt: 78.3% vs 30.7% ( $p<.001$ )<br>CO levels ↓ in intervention group ( $p<.001$ )<br>Reason to quit = health<br>80.6% vs 72.8% ( $p<.001$ ) |             |
| W      | Awofeso, Levy & Morris 2001 [43]<br>Australia                                  | Pre-post | Tobacco Control Pilot Program (not ban)<br>Self-administered attitudinal survey<br>NRT                                                                                                                                                                                                              | Female prisoners, n=9<br>Male prisoners, n=15                                               | Descriptive analysis                                                                                           | 6 month follow-up<br>CA: 4/24 (no females) 16.7%<br>Those that resumed smoking showed<br>↓ in quantity smoked: 9/20 (45%)                                                                                                                                                                                                                                                                                                                                                                                                                 |             |

| Rating | Study, Country                                        | Design   | Intervention                                                                                                                                                                                                                                                                                                                                                                                                                                 | Sample                                                      | Method of Analysis                                                                              | Outcomes                                                                                                                                                                                                                                                                                                               |                                             |
|--------|-------------------------------------------------------|----------|----------------------------------------------------------------------------------------------------------------------------------------------------------------------------------------------------------------------------------------------------------------------------------------------------------------------------------------------------------------------------------------------------------------------------------------------|-------------------------------------------------------------|-------------------------------------------------------------------------------------------------|------------------------------------------------------------------------------------------------------------------------------------------------------------------------------------------------------------------------------------------------------------------------------------------------------------------------|---------------------------------------------|
|        |                                                       |          |                                                                                                                                                                                                                                                                                                                                                                                                                                              |                                                             |                                                                                                 | Cessation                                                                                                                                                                                                                                                                                                              | Behavioural                                 |
| W      | MacAskill <i>et al.</i> 2008 [35]<br>UK               | Pre-post | Pilot Smoking Cessation Program - 4 prisons<br><i>Intervention:</i> NRT for recommended course, and either group support with facilitator/one-on-one support by prison-based staff for 6 weeks. Included 3-phase social marketing approach.<br>Qualitative data: Semi-structured interviews in small groups/pairs.<br>Quantitative data: routinely collected on attendance and smoking levels<br>Abstinence validated by expired CO reading. | Male prisoners, $n=159$<br>Interviews with 25 of the sample | Descriptive analysis<br>Process evaluation: case study approach to examine and compare 4 pilots | 4 week follow-up<br>Small group PPA rate: 58 - 82%<br>One-on-one PPA rate: 25 - 40%                                                                                                                                                                                                                                    | Black market for nicotine patches developed |
| W      | Makris, Gourgoulianis & Hatzoglou 2012 [36]<br>Greece | Pre-post | Smoking Cessation Centre within prison<br>Baseline questionnaire: medical history, smoking history, drug use history, corrections history and FTND<br><i>Intervention:</i> Pharmaceutical (Varenicline for 3 or 4 months) and/or counselling                                                                                                                                                                                                 | Male smoker prisoners, $n=154$                              | $\chi^2$ test and independent-sample t-test                                                     | 3 month follow-up CA: 30.7%<br>1 year follow-up CA: 20.2%<br>Factors related to long-term CA ( $p<.005$ ): decreased smoking when incarcerated, prior quit attempts, average dependence levels, started smoking >21yrs old, no history of drug addiction, long-term incarceration, limited prisoners & smokers in cell |                                             |
| W      | Richmond <i>et al.</i> 2006 [8]<br>Australia          | Pre-post | Feasibility of multi-component smoking cessation intervention<br><i>Intervention:</i> 2 brief CBT sessions, NRT, bupropion and self-help resources<br>Abstinence validated by expired CO readings                                                                                                                                                                                                                                            | Male prisoners, $n=30$                                      | Group comparisons:<br>Fisher's exact test<br>Wilcoxon's sign-rank test                          | 5 month follow-up<br>PPA rate: 37%; CA rate: 26%<br>6 month follow-up<br>PPA rate: 26%; CA rate: 22%<br>Relapsed prisoners: smoked significantly less tobacco/week ( $p<.05$ )                                                                                                                                         |                                             |

| Rating                    | Study, Country                          | Design   | Intervention                                                                                                                                                                                                                                                                                                                                           | Sample                                                                                                                                                                                                  | Method of Analysis                                                                                                                    | Outcomes                                                                                                                                                                                                                                                                                                                                                                                                                                             |                                               |
|---------------------------|-----------------------------------------|----------|--------------------------------------------------------------------------------------------------------------------------------------------------------------------------------------------------------------------------------------------------------------------------------------------------------------------------------------------------------|---------------------------------------------------------------------------------------------------------------------------------------------------------------------------------------------------------|---------------------------------------------------------------------------------------------------------------------------------------|------------------------------------------------------------------------------------------------------------------------------------------------------------------------------------------------------------------------------------------------------------------------------------------------------------------------------------------------------------------------------------------------------------------------------------------------------|-----------------------------------------------|
|                           |                                         |          |                                                                                                                                                                                                                                                                                                                                                        |                                                                                                                                                                                                         |                                                                                                                                       | Cessation                                                                                                                                                                                                                                                                                                                                                                                                                                            | Behavioural                                   |
| W                         | Turan & Turan 2016 [48]<br>Turkey       | Pre-post | Pharmacological intervention in prison with indoor smoking ban. Information session also held for all prisoners and staff. Intervention options for those with moderate/high FTND score & desire to quit included: NRT, bupropion, or varenicline – participants required to pay for all options<br>4 data collections point: baseline, 1,2 & 6 months | 179 participants<br>- 109 prisoners & 70 staff<br>- 166 men & 13 women<br><br>Tobacco cessation treatment offered to 63 participants (49 prisoners & 14 staff)<br>- 59 accepted (at cost to themselves) | Mann-Whitney U test<br>Pearson's r<br>Chi-square test<br>Fisher's exact test                                                          | Mean CPD ↑ (20.2 to 22.3) since incarceration.<br>High attrition at 1 month follow up - only 2 had been taking planned pharmacotherapy (not all the time and did not quit).<br>Attrition due to prisoners being released or moving prison (19), or not taking planned pharmacotherapy and continuing smoking (40).<br>Reasons for not taking pharmacotherapy:<br>High cost (40%), unsuitable prison environment (35%), strong desire to smoke (25%). |                                               |
| <b>Indoor Smoking Ban</b> |                                         |          |                                                                                                                                                                                                                                                                                                                                                        |                                                                                                                                                                                                         |                                                                                                                                       |                                                                                                                                                                                                                                                                                                                                                                                                                                                      |                                               |
| M                         | Kauffman <i>et al.</i> 2011 [34]<br>USA | Pre-post | Indoor smoking ban<br>NRT available for purchase<br>Questionnaire: modified NHANES tobacco questionnaire, FTND, addition questions on quitting (from NHIS) and health impacts of tobacco use                                                                                                                                                           | Male prisoners, <i>n</i> =200                                                                                                                                                                           | Group comparisons:<br>Fisher's exact test<br>Pre-post individual change: McNemar's test<br>Paired t-test<br>Wilcoxon's sign-rank test | no. of smokers ↑<br>CPD ↓ ( <i>p</i> <.001)<br>smokeless tobacco consumption ↑ ( <i>p</i> <.001)<br>No smokers participated in free prison-sponsored group counselling program or NRT                                                                                                                                                                                                                                                                | 51.2% of smokers smoked indoors following ban |

| Rating                                   | Study, Country                               | Design            | Intervention                                                                                                                                                                                                                                                                                                                                                                                                                                                    | Sample                                                                                                                                                                                                                                         | Method of Analysis                                                            | Outcomes                                                                                                                                                                                                                                                                                                                                                          |                                                                                                                                                                              |
|------------------------------------------|----------------------------------------------|-------------------|-----------------------------------------------------------------------------------------------------------------------------------------------------------------------------------------------------------------------------------------------------------------------------------------------------------------------------------------------------------------------------------------------------------------------------------------------------------------|------------------------------------------------------------------------------------------------------------------------------------------------------------------------------------------------------------------------------------------------|-------------------------------------------------------------------------------|-------------------------------------------------------------------------------------------------------------------------------------------------------------------------------------------------------------------------------------------------------------------------------------------------------------------------------------------------------------------|------------------------------------------------------------------------------------------------------------------------------------------------------------------------------|
|                                          |                                              |                   |                                                                                                                                                                                                                                                                                                                                                                                                                                                                 |                                                                                                                                                                                                                                                |                                                                               | Cessation                                                                                                                                                                                                                                                                                                                                                         | Behavioural                                                                                                                                                                  |
| W                                        | Etter <i>et al.</i> 2012 [45]<br>Switzerland | Separate pre-post | Indoor ban (3 prisons)<br>Interviews & focus groups to develop prison-based interventions<br><i>Interventions in prison A, B &amp; C:</i><br>A (open): extension smoke-free zones; NRT for purchase; self-help booklets<br>B (closed): limit smoking locations; counselling; free NRT (limited); self-help booklets<br>C (remand): limit smoking locations; counselling; free NRT; self-help booklets<br>Pre (2009) -post (2011) surveys of prisoners and staff | Pre (2009); Post (2011) (respectively)<br>A: male prisoners, $n=70$ ; $n=60$<br>staff, $n=51$ ; $n=48$<br>B: male prisoners, $n=27$ ; $n=30$<br>staff, $n=27$ ; $n=24$<br>C: mainly male prisoners, $n=116$ ; $n=66$<br>staff, $n=126$ ; $n=0$ | Group comparisons: tests, Mann-Whitney U tests and independent-sample t-tests | No significant change in prisoner smoking behaviours or duration of exposure to SHS across prisons. Significant changes in prison A ( $p<.005$ ): prisoners reported receiving more medical support to quit and reported decreased SHS exposure; staff reported decreased SHS exposure. Prison C ( $p<.005$ ): reported increased SHS exposure in medical service |                                                                                                                                                                              |
| W                                        | Lasnier <i>et al.</i> 2011 [46]<br>Canada    | Pre-post          | Indoor smoking ban<br>3 correctional centres in Quebec                                                                                                                                                                                                                                                                                                                                                                                                          | Male & female prisoners, $n=113$                                                                                                                                                                                                               | Descriptive analysis                                                          | 89.0% of smokers reported reduction in tobacco consumption<br>34.0% reported perceived reduction in exposure to SHS<br>45.0% perceived improvement in health                                                                                                                                                                                                      | 93.0% of smokers smoked indoors following ban<br>Limited cigarettes/ prisoner vs reported number of CPD suggests cigarette black market<br>Poor enforcement by smoking staff |
| <b>Complete Smoking Ban /Combination</b> |                                              |                   |                                                                                                                                                                                                                                                                                                                                                                                                                                                                 |                                                                                                                                                                                                                                                |                                                                               |                                                                                                                                                                                                                                                                                                                                                                   |                                                                                                                                                                              |
| M                                        | Cropsey & Kristeller 2005 [31]<br>USA        | Pre-post          | Smoking ban<br>NRT available for purchase<br>Baseline questionnaire: FTND, CES-D, HHWS, questions on smoking history, stage of change, and level of agreement with ban.<br>Follow-up questionnaire 4 days & 1 month after ban: CES-D, HHWS, QSU-Brief Form, questions on difficulty quitting, smoking behaviors, and level of agreement with ban                                                                                                                | Male prisoners, $n=188$<br>Participants classified as smokers or quitters (in prison following ban)                                                                                                                                            | Univariate ANOVA<br>Repeated-measures 2 x 2 ANCOVA                            | Smokers were more nicotine dependent ( $p<.001$ ). Smoking status was predictor of withdrawal effect at follow-up ( $p<.01$ ).                                                                                                                                                                                                                                    | 76% of participants were still smoking in prison 1 month after the ban.<br>Poor enforcement of ban by staff                                                                  |

| Rating | Study, Country                                          | Design                 | Intervention                                                                                                                                                                   | Sample                                                                                | Method of Analysis                             | Outcomes                                                                                                                                                                                                                                                                                                                                                          |                                                                                                                                                                                                                                                                                                     |
|--------|---------------------------------------------------------|------------------------|--------------------------------------------------------------------------------------------------------------------------------------------------------------------------------|---------------------------------------------------------------------------------------|------------------------------------------------|-------------------------------------------------------------------------------------------------------------------------------------------------------------------------------------------------------------------------------------------------------------------------------------------------------------------------------------------------------------------|-----------------------------------------------------------------------------------------------------------------------------------------------------------------------------------------------------------------------------------------------------------------------------------------------------|
|        |                                                         |                        |                                                                                                                                                                                |                                                                                       |                                                | Cessation                                                                                                                                                                                                                                                                                                                                                         | Behavioural                                                                                                                                                                                                                                                                                         |
| M      | Thibodeau, Jorenby, Seal, Kim & Sosman 2010 [39]<br>USA | Pre-post               | Complete smoking ban<br>2 interviews<br>1 month pre, 1 month post release                                                                                                      | Males prisoners, $n=49$<br>Average incarceration time = 2.3 years                     | Bivariate analyses<br>Multivariate modelling   | Pre-release intent predicts post-release behavior ( $p<.001$ )<br><i>Pre-release:</i> 67.3% perceived health improvements; 22% intended to smoke upon release; 67% intended abstinence.<br><i>Post-release:</i> 61% abstinent 1 month; 84% supportive of pre-release smoking abstinence program; ↓ in FTND mean score post release                                |                                                                                                                                                                                                                                                                                                     |
| W      | Howell, Guydish, Kral & Comfort 2015 [32]<br>USA        | Cross-sectional survey | Complete smoking ban                                                                                                                                                           | 172 male ex-prisoners<br>Release from prison in past 12 months but not past 3 months. | Logistic regression – bivariate & multivariate | 74% smoking since recent release (PPA) from prison with complete ban<br>Significant predictors of return to smoking:<br>Unadjusted model – every five years of incarceration (OR=1.32)<br>Adjusted model – lifetime history of substance use (OR=2.47)<br>Total average incarceration time across life time:<br>non-smokers = 10.5 years;<br>smokers = 12.1 years |                                                                                                                                                                                                                                                                                                     |
| W      | Leone & Kinkade 1994 [47]<br>USA                        | Separate pre-post      | Complete smoking ban<br>Pre –post analysis of staff sick days, prisoner-on-prisoner and prisoner-on-staff assaults, disciplinary actions, and attempted and completed suicides | Administrative data - 1 year pre, and 1 year post                                     | t-test                                         | No significant change in staff sick days<br>No significant change in no. of prisoner attempted/completed suicides                                                                                                                                                                                                                                                 | ↑ monthly mean prisoner-on-prisoner assaults without injury 1.31 to 3.73 ( $p<.001$ ), prisoner-on-staff assaults without injury 0.08 to 0.64 ( $p<.05$ )<br>↑ no. of prisoners moved to SHU C (administrative segregation) 334.46 to 309.10 ( $p<.005$ ), but not SHU D (disciplinary segregation) |

| Rating | Study, Country                           | Design            | Intervention                                                                                                                                                                                                    | Sample                                                                                                                                          | Method of Analysis               | Outcomes                                                                                                                                                                                                     |                                                                                                                                                                                                                                         |
|--------|------------------------------------------|-------------------|-----------------------------------------------------------------------------------------------------------------------------------------------------------------------------------------------------------------|-------------------------------------------------------------------------------------------------------------------------------------------------|----------------------------------|--------------------------------------------------------------------------------------------------------------------------------------------------------------------------------------------------------------|-----------------------------------------------------------------------------------------------------------------------------------------------------------------------------------------------------------------------------------------|
|        |                                          |                   |                                                                                                                                                                                                                 |                                                                                                                                                 |                                  | Cessation                                                                                                                                                                                                    | Behavioural                                                                                                                                                                                                                             |
| W      | Lincoln <i>et al.</i> 2009 [42]<br>USA   | Pre-post          | Complete smoking ban<br>Smoking resumption post release<br>Intake interview on smoking habits. Follow-up interviews at 1 and 6 months                                                                           | Prisoners, <i>n</i> =102<br>Smokers prior to prison<br>High rates of comorbidity including Hepatitis C<br>Average incarceration time = 2 months | Descriptive analysis             | 1 month follow-up<br>1 day CA rate: 37.3%<br>1 week CA rate: 17.7%<br>1 month CA rate: 13.7%<br>6 month follow-up estimated CA: 3.1%                                                                         |                                                                                                                                                                                                                                         |
| W      | Turner <i>et al.</i> 2013 [40]<br>Canada | Separate pre-post | Complete smoking ban<br>Gambling survey pre and post smoking ban                                                                                                                                                | Pre: 254 male prisoners<br>Post: 395 male prisoners                                                                                             | Mixed models analysis            |                                                                                                                                                                                                              | Survey: significant drop in tobacco used as currency by gambling offenders post ban from 28.6% to 2.3% ( <i>p</i> <.001).<br>Increase in money wagers.<br>In-depth interview: drop on federal offenders who gambled in prison post ban. |
| W      | Voglewede & Noel 2004 [41]<br>USA        | Pre-post          | Smoking ban<br>Predicted current need to smoke for incarcerated smokers<br>Interview: questions regarding demographics, custodial history, smoking habits 12 months prior to incarceration, modified FTND & QSU | Males prisoners, <i>n</i> =150<br>Smokers prior to prison                                                                                       | Hierarchical regression analyses | Predictors of need to smoke ( <i>p</i> <.005):<br>No. of times incarcerated & future intent to smoke once released<br>Predictors of nicotine dependence ( <i>p</i> <.005): age, years of smoking, no. of CPD |                                                                                                                                                                                                                                         |

**Abbreviations** S: Strong; M: Moderate; W: Weak; RCT: randomised controlled trial; NRT: nicotine replacement therapy; CES-D: Centre for Epidemiologic Studies Depression Scale; CES-D-20: Centre for Epidemiologic Studies Depression Scale-20 item; PPA: point prevalence abstinence; CA: continuous abstinence; CBT: cognitive-behavioural therapy; NHANES: National Health and Nutrition Examination Survey; FTND: Fagerstrom Test for Nicotine Dependence; NHIS: National Health Interview Survey; HHWS: Hughes-Hatsukami Withdrawal Scale; NOR: nortriptyline; QSU: Questionnaire of Smoking Urges; OR: odds ratio; CPD: cigarettes per day; SHS: second-hand smoke; SHU: special housing units; CO: carbon monoxide.
